Anesthesiology  
1999; 90:458-69  
© 1999 American Society of Anesthesiologists, Inc.  
Lippincott Williams & Wilkins, Inc.

## Immunochemical Evidence against the Involvement of Cysteine Conjugate $\beta$ -lyase in Compound A Nephrotoxicity in Rats

Dolores B. Njoku, M.D.\*, Lance R. Pohl, Pharm.D., Ph.D.,† Edward A. Sokoloski, B.S.,‡ Michael R. Marchick,§ Craig B. Borkowf, Ph.D.,|| Jackie L. Martin, M.D.#

**Background:** Compound A, a degradation product of sevoflurane, causes renal corticomedullary necrosis in rats. Although the toxicity of this compound was originally hypothesized to result from the biotransformation of its cysteine conjugates into toxic thionoacyl halide metabolites by renal cysteine conjugate  $\beta$ -lyase, recent evidence suggests that alternative mechanisms may be responsible for compound A nephrotoxicity. The aim of this study was to evaluate these issues by determining whether mercapturates and glutathione conjugates of compound A could produce renal corticomedullary necrosis in rats, similar to compound A, and whether renal covalent adducts of the thionoacyl halide metabolite of compound A could be detected immunochemically.

**Methods:** Male Wistar rats were administered, intraperitoneally, N-acetylcysteine conjugates (mercapturates) of compound A (90 or 180  $\mu$ mol/kg) or glutathione conjugates of compound A (180  $\mu$ mol/kg) with or without intraperitoneal pretreatments with aminooxyacetic acid (500  $\mu$ mol/kg) or acivicin (250  $\mu$ mol/kg). Rats were killed after 24 h, and kidney tissues were analyzed for toxicity by histologic examination or for protein adducts by immunoblotting or immunohistochemical analysis, using antisera raised against the covalently bound thionoacyl halide metabolite of compound A.

**Results:** Mercapturates and glutathione conjugates of compound A both produced renal corticomedullary necrosis similar to that caused by compound A. Aminooxyacetic acid, an inhibitor of renal cysteine conjugate  $\beta$ -lyase, did not inhibit the toxicity of the mercapturates, whereas acivicin, an inhibitor of  $\gamma$ -glutamyltranspeptidase, potentiated the toxicity of both classes of conjugates. No immunochemical evidence for renal protein adducts of the thionoacyl halide metabolite was found in rats 24 h after the administration of the mercapturates of compound A or in the kidneys of rats, obtained from a previous study, 5 and 24 h after the administration of compound A.

**Conclusion:** The results of this study are consistent with the idea that a mechanism other than the renal cysteine conjugate  $\beta$ -lyase pathway of metabolic activation is responsible for the nephrotoxicity of compound A and its glutathione and mercapturate conjugates in male Wistar rats. (Key words: Bioactivation; kidney; molecular toxicity.)

\* Assistant Professor, Department of Anesthesiology and Critical Care Medicine; Adjunct Investigator, Molecular and Cellular Toxicology Section.

† Chief, Molecular and Cellular Toxicology Section.

‡ Research Assistant, Laboratory of Biophysical Chemistry.

§ Research Assistant, Molecular and Cellular Toxicology Section.

|| National Research Council-National Institutes of Health Postdoctoral Fellow, Division of Epidemiology and Clinical Applications, Office of Biostatistics Research.

# Associate Professor, Department of Anesthesiology and Critical Care Medicine, Adjunct Investigator, Molecular and Cellular Toxicology Section.

Received from the Department of Anesthesiology and Critical Care Medicine, The Johns Hopkins Medical Institutions, Baltimore, Maryland, and the Molecular and Cellular Toxicology Section of the Laboratory of Molecular Immunology, the Laboratory of Biophysical Chemistry, and the Office of Biostatistics Research, National Heart, Lung and Blood Institute, National Institutes of Health, Bethesda, Maryland. Submitted for publication October 16, 1997. Accepted for publication July 13, 1998. Dr. Martin is a consultant to Ohmeda. Supported in part by the Ohmeda Corporation, Madison, Wisconsin. This funding was a grant-in-aid to J.L.M. Presented in part at the annual meeting of the American Society of Anesthesiologists, New Orleans, Louisiana, October 21, 1996, and at the Sixth European International Society for the Study of Xenobiotics, Gothenburg, Sweden, July 2, 1997.

Address reprint requests to Dr. Njoku: Department of Anesthesiology and Critical Care Medicine, The Johns Hopkins Hospital, Blalock 15, 600 North Wolfe Street, Baltimore, Maryland 21287. Address electronic mail to: NjokuD@gwgate.nhlbi.nih.gov

SEVOFLURANE [ $\text{FCH}_2\text{OCH}(\text{CF}_3)_2$ ] interacts with carbon dioxide adsorbents in anesthesia delivery systems to form the vinyl ether compound A [ $(\text{F}_2\text{C}=\text{C}(\text{CF}_3)\text{OCH}_2\text{F})$ ].<sup>1</sup> Compound A administered to rats produces dose- and time-dependent renal corticomedullary necrosis.<sup>2</sup> It has been hypothesized that the renal toxicity may be caused by a thionoacyl halide metabolite, formed from the metabolism of cysteine conjugates of compound A by renal cysteine conjugate  $\beta$ -lyase (renal  $\beta$ -lyase) (fig. 1).<sup>3</sup> This idea was based on the finding that the renal corticomedullary necrosis caused by other fluoroalkenes appeared to be mediated by similar toxic metabolites.<sup>4-6</sup> Thionoacyl halide metabolites are thought to cause toxicity, at least in part, by covalently altering renal cellular proteins.<sup>7-10</sup> In this regard, a preliminary immunochemical finding indicated the pres-

## MECHANISTIC STUDIES OF COMPOUND A NEPHROTOXICITY

ence of protein adducts of compound A in the kidneys of rats.<sup>#</sup> However, these results, using antitrifluoroacetyl sera, subsequently were found to result from nonspecific immunoreactivity (Martin *et al.*, unpublished data, December 2, 1994). Nonetheless, there is evidence to support the concept that compound A forms cysteine conjugates, which are further metabolized by renal  $\beta$ -lyase to produce a thionoacyl halide metabolite. Male Fischer 344 rats treated intraperitoneally with compound A excrete urinary mercapturates of compound A and urinary 3,3,3-trifluoro-2-(fluoromethoxy)propanoic acid, which would result from the reaction of the thionoacyl halide derivative of compound A with water.<sup>11,12</sup> It has also been shown that aminoxyacetic acid (AOAA), an inhibitor of renal  $\beta$ -lyase, partially blocked the nephrotoxicity of compound A in male Fischer 344 rats as measured by decreases in urine volume and proteinuria<sup>12</sup> and by decreases in urinary excretion of 3,3,3-trifluoro-2-(fluoromethoxy)propanoic acid.<sup>11</sup> Furthermore, cysteine conjugates of compound A have been shown to be substrates of rat renal  $\beta$ -lyase; however, the rates of reaction were several times faster than those found with human renal  $\beta$ -lyase, suggesting that humans may not be as susceptible to compound A nephrotoxicity as are rats.<sup>13</sup>

In contrast to these studies, it has been shown that pretreatment of Wistar rats with AOAA did not inhibit histologic kidney damage caused by inhalational administration of compound A.<sup>14</sup> This finding was confirmed in Fischer 344 rats, in which it was shown that AOAA did not inhibit the histologic renal injury or glucosuria caused by the intraperitoneal administration of compound A, even though there was improvement in biochemical markers for proximal tubular injury, namely urine volume, proteinuria, and  $\alpha$ -glutathione-S-transferase.<sup>15</sup> These studies suggest that compound A-induced renal necrosis may occur by a mechanism independent of renal  $\beta$ -lyase.

To help resolve whether renal  $\beta$ -lyase has a role in compound A-induced renal necrosis, we directly studied the mechanism of renal toxicity produced by mercapturates and glutathione conjugates of compound A. We evaluated renal damage using the histologic end point of necrosis, because it is an indisputable end point of toxicity. In addition, we raised a specific antibody to detect protein adducts of compound A that would be formed by the renal  $\beta$ -lyase pathway of metabolism (fig. 1).

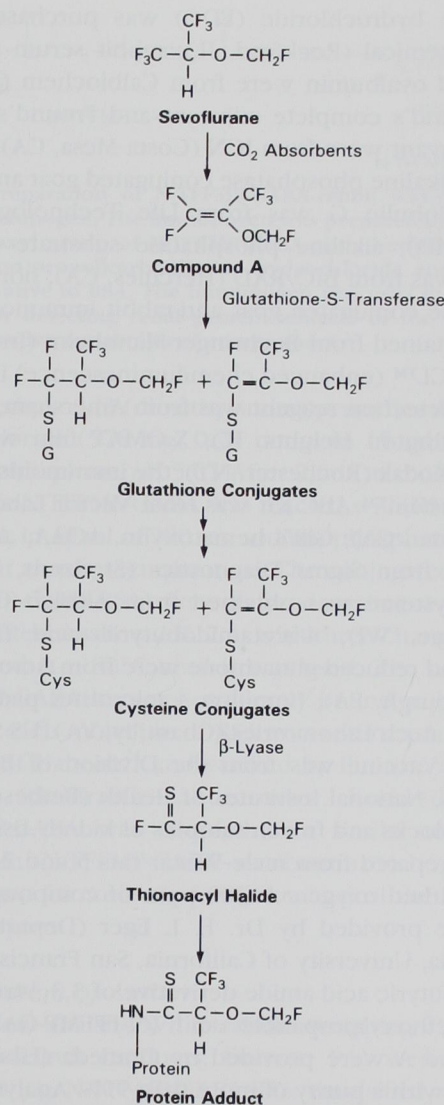

Fig. 1. A proposed pathway of compound A bioactivation and nephrotoxicity involving renal cysteine conjugate  $\beta$ -lyase. The first step of this mechanism involves the known dehydrofluorination of sevoflurane by carbon dioxide absorbents to form compound A. This product has been shown to form addition and addition-elimination conjugates with glutathione, in reactions catalyzed by glutathione-S-transferases. The glutathione conjugates are further metabolized to form cysteine conjugates, which are then acted on by renal cysteine conjugate  $\beta$ -lyase to form a thionoacyl halide reactive intermediate. The thionoacyl halide has been proposed to bind covalently to renal proteins and cause toxicity.

## Materials and Methods

### Chemicals and Reagents

Chemicals and reagents were obtained from the following sources. 1-Ethyl, 3-[3-(dimethylamino)propyl]car-

<sup>#</sup> Martin J, Dodge M, Pohl LR: Immunochemical detection of covalently modified kidney proteins in rats treated with the sevoflurane degradation product Compound A (sevo-olefin) (abstract). *ANESTHESIOLOGY* 1994; 81:A436.

bodiimide hydrochloride (EDC) was purchased from Pierce Chemical (Rockford, IL); rabbit serum albumin (RSA) and ovalbumin were from Calbiochem (La Jolla, CA); Freund's complete adjuvant and Freund's incomplete adjuvant were from ICN (Costa Mesa, CA); affinity purified alkaline phosphatase conjugated goat anti-rabbit immunoglobulin G was from Life Technologies (Bethesda, MD); alkaline phosphatase substrate reaction mixture was from BIO/RAD (Hercules, CA); horseradish peroxidase conjugated goat anti-rabbit immunoglobulin G was obtained from Boehringer-Mannheim (Indianapolis, IN); ECL™ (enhanced chemiluminescence) immunoblotting detection reagent was from Amersham Life Science (Arlington Heights, IL); X-OMAT film was from Eastman Kodak (Rochester, NY); the immunohistochemical Vectastain™ ABC Kit was from Vector Laboratories (Burlingame, CA); Gill's hematoxylin, AOAA, and acivicin were from Sigma Diagnostics (St. Louis, MO); N-acetyl-L-cysteine was obtained from Aldrich Chemical (Milwaukee, WI); 4-acetamidobutyric acid (N-acetyl-GABA) and reduced glutathione were from Acros Organics (Pittsburgh, PA); Immulon 4 microtiter plates were from Dynatech Laboratories (Chantilly, VA). US Standard Pertussis Vaccine was from the Division of Biological Standards, National Institutes of Health (Bethesda, MD). Paraffin blocks and frozen samples of kidney tissue (< 1 yr old) prepared from male Wistar rats 5 and 24 h after they breathed oxygen  $\pm$  300 ppm of compound A for 3 h were provided by Dr. E. I. Eger (Department of Anesthesia, University of California, San Francisco). The  $\gamma$ -aminobutyric acid amide derivative of 3,3,3-trifluoro-2-(fluoromethoxy)propanoic acid (N-TFFMP-GABA) and compound A were provided by Ohmeda (Liberty Corner, NJ), with a purity of more than 99%. Analytical data for N-TFFMP-GABA are as follows: melting point: 65.5 to 67.5°C;  $^1\text{H}$  NMR ( $\text{CDCl}_3$ , tetramethylsilane standard): 1.91 (quintet,  $J = 7$  Hz, 2H), 2.43 (triplet,  $J = 7$  Hz, 2H), 3.42 (quartet,  $J = 7$  Hz, 2H), 4.51 (quartet,  $J_{\text{H,F}} = 6.7$  Hz, 1H), 5.42 (ddd,  $J_{\text{H,H(geminal)}} = 33$  Hz,  $J_{\text{H,F(geminal)}} = 51$  Hz,  $J_{\text{H,H(w-coupling)}} = 2.9$  Hz, 2H), 6.85 (broad singlet, 1H);  $^{19}\text{F}$  NMR ( $\text{CDCl}_3$ , fluorotrichloromethane standard): -75.00 (multiplet, 3F), -152.62 (dd,  $J_{\text{H,F}} = 51, 57$  Hz, 1F);  $^{13}\text{C}$  NMR ( $\text{CDCl}_3$ , tetramethylsilane standard): 24.070, 31.084, 38.937, 77.616 (multiplet), 103.343 (doublet), 122.059 (quartet), 163.015, 178.018.

#### Synthesis of Compound A Mercapturates

Compound A mercapturates were synthesized by reacting compound A (23.8 mmol) with N-acetyl-L-cysteine (21.8 mmol) in methanolic sodium methoxide, accord-

ing to the method of Spracklin and Kharasch.<sup>11</sup>  $^{19}\text{F}$  NMR analysis revealed that the purified product consisted of approximately 54% and 46% of addition, N-acetyl-S-(1,1,3,3,3-pentafluoro-2-(fluoromethoxy)propyl)-L-cysteine (alkane), and addition-elimination, N-acetyl-S-(1-fluoro-2-(fluoromethoxy)-2-(trifluoromethyl)vinyl)-L-cysteine (alkene) products, respectively. The mercapturates were synthesized in a yield of 17% (1.23 g), and a purity of at least 98% based on thin-layer chromatographic analysis. No attempt was made to resolve the alkane and alkene isomeric products.

#### Synthesis of the Glutathione Conjugates of Compound A

The glutathione conjugates of compound A were synthesized by reacting reduced glutathione (6 mmol) with compound A (4 mmol), according to the methods of Jin *et al.*,<sup>16</sup> with the following differences: The reaction was conducted anaerobically and the high-performance liquid chromatographic method of purification was modified. The glutathione conjugates were purified by preparative high-performance liquid chromatographic analysis using a Vydac reverse-phase column ( $\text{C}_{18}$ , 10  $\mu\text{m}$ , 25 cm  $\times$  2.2 cm ID, Hesperia, CA) with the absorption detector set at 220 nm. The mobile phase consisted of a mixture of solvent A (0.1% [vol/vol] trifluoroacetic acid in water) and solvent B (0.1% [vol/vol] trifluoroacetic acid in acetonitrile) delivered progressively at a flow rate of 10 ml/min using a linear gradient starting from 100% solvent A to 80% solvent B in 80 min. The glutathione conjugates were eluted as a mixture, with retention times of approximately 27 to 30 min. Solvents were removed under vacuum in a SpeedVac concentrator (Savant, Farmingdale, NY) to give 578 mg (30% yield) of product that was at least 98% pure based on high-performance liquid chromatographic analysis.  $^{19}\text{F}$  NMR and  $^1\text{H}$  NMR analyses revealed that the product was composed of approximately a 40% and 60% mixture of addition S-(1,1,3,3,3-pentafluoro-2-(fluoromethoxy)propyl)-glutathione (alkane) and addition-elimination S-(1-fluoro-2-(fluoromethoxy)-2-(trifluoromethyl)vinyl)glutathione (alkene) products, respectively. These assignments were confirmed by electrospray mass spectrometry, revealing an M+H ion at  $m/z$  487.9 or  $m/z$  467.8, corresponding to the alkane and alkene products, respectively.<sup>16</sup> No attempt was made to resolve the alkane and alkene isomeric products.

## MECHANISTIC STUDIES OF COMPOUND A NEPHROTOXICITY

*Animal Treatments*

These studies were approved by our institution's animal research committee. Male Wistar rats weighing 200–250 g (Charles River, Portage, MD) were assigned randomly to one of eight groups. All reagents were administered intraperitoneally. Group 1 ( $n = 5$ ) was administered the first vehicle, 100 mM  $\text{NaHCO}_3$  ( $\text{pH}$  8.0); groups 2 and 3 ( $n = 5$  each) received 90 or 180  $\mu\text{mol}/\text{kg}$  of the compound A mercapturates in 100 mM  $\text{NaHCO}_3$  ( $\text{pH}$  8.0), respectively; group 4 ( $n = 5$ ) was pretreated with 500  $\mu\text{mol}/\text{kg}$  AOAA in water 1 h before the administration of the compound A mercapturates (180  $\mu\text{mol}/\text{kg}$ ); group 5 ( $n = 5$ ) was pretreated with 250  $\mu\text{mol}/\text{kg}$  acivicin in normal saline 1 h before the administration of the compound A mercapturates (180  $\mu\text{mol}/\text{kg}$ ); group 6 ( $n = 5$ ) received the second vehicle, 0.9% normal saline; group 7 ( $n = 5$ ) received 180  $\mu\text{mol}/\text{kg}$  of the glutathione conjugates of compound A in normal saline; and group 8 ( $n = 5$ ) was pretreated with 250  $\mu\text{mol}/\text{kg}$  acivicin in normal saline 1 h before the glutathione conjugates of compound A were administered. After 24 h, animals were killed and their kidneys were removed. One kidney was cut longitudinally, fixed in buffered formalin, and embedded in paraffin by American Histolabs (Gaithersburg, MD). Slides were made (5- $\mu\text{m}$  thick), stained with hematoxylin and eosin (American Histolabs), randomly ordered, and evaluated for injury by one of the investigators (L.R.P.), who was blinded to the treatment groups. Each specimen was graded for the percentage of necrotic tubular cells in the corticomedullary junction and assigned a numeric value of 1 to 5 corresponding to the degree of injury in the following manner: none, 1; minimal (up to 10%), 2; moderate (10–30%), 3; moderately severe (30–70%), 4; and severe ( $> 70\%$ ), 5. Sections from the paraffin blocks (5- $\mu\text{m}$  thick) were also mounted on poly(L-lysine)-treated glass slides (American Histolabs). After deparaffinization, sections were stained immunohistochemically for thionoacyl halide protein adducts according to a previously described procedure.<sup>17</sup> The remaining portions of the kidneys were used to prepare subcellular fractions according to an established method.<sup>18</sup> The subcellular fractions were analyzed for the presence of protein adducts of the thionoacyl halide by an immunoblotting procedure, using ECL immunoblotting detection reagent and Kodak X-OMAT™ film.<sup>19</sup>

*Synthesis of the Immunogen*

An immunogen was prepared by covalently coupling N-TFFMP-GABA to RSA using a two-step process as described by Davis and Preston<sup>20</sup> (fig. 2). N-TFFMP-GABA (157 mg, 0.6 mmol, in 5 ml of methanol) was reacted

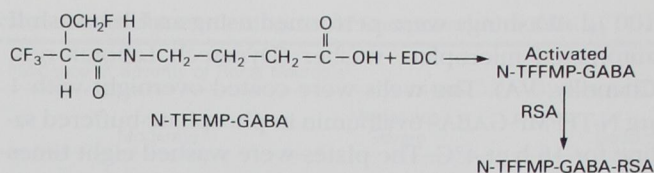

Fig. 2. Preparation of N-TFFMP-GABA-rabbit serum albumin (RSA) immunogen. The immunogen was prepared by activating the carboxyl group of N-TFFMP-GABA with 1-ethyl, 3-[3-(dimethylamino)propyl]carbodiimide hydrochloride and coupling this derivative to RSA. The immunogen was used to raise antibodies for detecting renal protein adducts of the thionoacyl halide reactive metabolite of compound A.

with 1-ethyl, 3-[3-(dimethylamino)propyl]carbodiimide hydrochloride (576 mg, 0.75 mmol in 15 ml of 20 mM sodium phosphate,  $\text{pH}$  5.0). After 2 min at room temperature, the N-TFFMP-GABA was reacted with RSA (80 mg, 1.2  $\mu\text{mol}$ , in 40 ml of 200 mM sodium phosphate,  $\text{pH}$  8.0) overnight at room temperature. The conjugated product (N-TFFMP-GABA-RSA) was dialyzed against 1.5 l phosphate-buffered saline,  $\text{pH}$  7.4, with three changes at 4°C and stored at  $-80^\circ\text{C}$  until it was used. The number of N-TFFMP-GABA haptens covalently bound to lysine residues of each molecule of RSA was estimated using the method of Habeeb<sup>21</sup> and verified by fluorine elemental analysis (Galbraith Laboratories, Knoxville, TN). N-TFFMP-GABA was coupled in a similar manner to ovalbumin (N-TFFMP-GABA-ovalbumin) to be used as a test antigen for antibody formation against the N-TFFMP-GABA hapten.

*Preparation of Antisera*

Two New Zealand White rabbits weighing 2.5 kg (Covance Research Products, Denver, PA) were injected with 750  $\mu\text{g}$  N-TFFMP-GABA-RSA emulsified with two volumes of Freund's complete adjuvant at 20 sites subcutaneously along the back and at an intramuscular site in each hind limb. To augment antibody production, a total of 3 protective units of Pertussis vaccine was injected subcutaneously along six separate sites along the back. After 2 and 4 weeks, the animals were given booster doses of 750  $\mu\text{g}$  N-TFFMP-GABA-RSA immunogen, emulsified in two volumes of Freund's incomplete adjuvant, by the same routes of immunization. Sera were collected after 10 days and for the ensuing 4 weeks and stored at  $-20^\circ\text{C}$ .

*Enzyme-linked Immunosorbent Assay of Rabbit Antisera*

All assays were performed in triplicate in the wells of Immulon 4 microtiter plates in a total reaction volume of

100  $\mu$ l. Washings were performed using an Ultrawash II automated microplate washer (Dynatech Laboratories, Chantilly, VA). The wells were coated overnight with 1  $\mu$ g N-TFFMP-GABA-ovalbumin in phosphate-buffered saline for 16 h at 4°C. The plates were washed eight times with 10 mM Tris-saline, pH 7.6, containing 0.5% (wt/vol) casein and 0.01% (wt/vol) Thimerosal (a washing buffer), to remove unbound material and to block unoccupied protein binding sites. Serial dilutions of preimmune and immune sera in washing buffer were added to the wells, and the plates were incubated for 3 h at room temperature. The plates were washed four times with washing buffer, followed by the addition of alkaline phosphatase conjugated goat anti-rabbit immunoglobulin G (1:1,000 in washing buffer). After incubation for 1.5 h at room temperature, the plates were washed four times with washing buffer, followed by four washes with phosphate-buffered saline. An alkaline phosphatase substrate reaction mixture was added to each well. The absorbance of the solutions in each well was determined at 405 nm after 15 min using a SpectraMax 250 automatic plate reader (Molecular Devices, Sunnyvale, CA).

To determine the specificity of the enzyme-linked immunosorbent assay for the N-TFFMP moiety, the assay was performed as described before, except that N-TFFMP-GABA antisera (1:100,000 dilution) was preincubated for 30 min with increasing concentrations of N-TFFMP-GABA or N-acetyl-GABA (0.01, 0.1, 1.0, and 10 mM) before being added to the plates.

#### *Incubation of Compound A Mercapturates with Rat Kidney Cytosol*

To show that our antisera could detect protein adducts of the thionoacyl halide metabolite of compound A in tissues, mercapturates of compound A (1 mM) and rat kidney cytosol (3 mg/ml) from untreated rats, previously dialyzed against phosphate-buffered saline overnight at 4°C to remove residual reduced glutathione, were incubated for 16 h at 37°C with gentle shaking. Samples of the reaction mixtures were analyzed for protein adducts by immunoblotting them with N-TFFMP-GABA antisera (1:1,000 dilution) before and after the antisera were preincubated for 30 min with increasing concentrations of the antisera inhibitor, N-TFFMP-GABA (0.01, 0.1, and 1.0 mM). To verify that protein adduct formation depended on  $\beta$ -lyase metabolism, immunoblot analysis was repeated with rat renal cytosol that had been preincubated with 1 and 10 mM AOAA for 30 min before incubation with the mercapturates of compound A.

#### *Statistical Analysis*

Three main experiments were analyzed, each consisting of a comparison of three treatments: a comparison of (1) control (NaHCO<sub>3</sub>), (2) mercapturate conjugates alone, and (3) AOAA plus mercapturate conjugates; a comparison of (1) control (NaHCO<sub>3</sub>), (2) mercapturate conjugates alone, and (3) acivicin plus mercapturate conjugates; and a comparison of (1) control (saline), (2) glutathione conjugates alone, and (3) acivicin plus glutathione conjugates. It was hypothesized that the mercapturate and glutathione conjugates would produce more renal necrosis than the control and that the addition of AOAA or acivicin to the conjugates would produce more renal necrosis than the conjugates alone. The Jonckheere statistic with ties<sup>22</sup> was used to compare the null hypothesis of no difference with the alternative hypothesis that there was an increasing trend for renal necrosis from the treatments in the order given. That is, this test determined whether treatment 1 was  $\leq$  treatment 2, whether treatment 1 was  $\leq$  treatment 3, and whether treatment 2 was  $\leq$  treatment 3, with at least one strict inequality ( $<$ ). When the test statistic for an experiment was significant at the 5% level, pairwise one-sided Mann-Whitney tests<sup>22</sup> were calculated to determine which of the three ordered pairwise comparisons showed significant differences at the 5% level.

## **Results**

#### *Renal Damage of Mercapturates and Glutathione Conjugates of Compound A*

When rats were given a 90- $\mu$ mol/kg mixture of the mercapturates of compound A, consisting of approximately 54% and 46% of addition, N-acetyl-S-(1,1,3,3,3-pentafluoro-2-(fluoromethoxy)propyl)-L-cysteine (alkane), and addition-elimination, N-acetyl-S-(1-fluoro-2-(fluoromethoxy)-2-(trifluoromethyl)vinyl)-L-cysteine (alkene) products in NaHCO<sub>3</sub> solution, respectively, no histologic renal damage was observed after 24 h (results not shown). At a dose of 180  $\mu$ mol/kg of the mercapturates, renal necrosis was produced and was localized to the corticomedullary junction. The degree of necrosis ranged from minimal to severe, in which more than 70% of the corticomedullary junction tubular cells were necrotic (table 1, fig. 3B). Pretreatment with AOAA before the administration of the mercapturates did not appear to inhibit the renal necrosis produced by the mercapturate mixture (table 1, fig. 3C), whereas pretreatment with acivicin before the administration of the mercaptu-

## MECHANISTIC STUDIES OF COMPOUND A NEPHROTOXICITY

**Table 1. Histopathology 24 h after the Administration of Mercapturates or Glutathione Conjugates of Compound A to Rats**

| Treatment                     | Incidence of Severity of Renal Necrosis* |         |          |                   |        |
|-------------------------------|------------------------------------------|---------|----------|-------------------|--------|
|                               | None                                     | Minimal | Moderate | Moderately Severe | Severe |
| Control (NaHCO <sub>3</sub> ) | 5                                        | 0       | 0        | 0                 | 0      |
| Control (saline)              | 5                                        | 0       | 0        | 0                 | 0      |
| Mercapturate conjugates       | 0                                        | 1       | 2        | 1                 | 1      |
| AOAA +                        | 0                                        | 2       | 1        | 0                 | 2      |
| Acivicin +                    | 0                                        | 0       | 0        | 1                 | 4      |
| Glutathione conjugates        | 0                                        | 4       | 0        | 1                 | 0      |
| Acivicin +                    | 0                                        | 1       | 0        | 2                 | 2      |

\* Mercapturates or glutathione conjugates (180  $\mu\text{mol/kg}$ ) were administered to five rats. A kidney section from each animal, which was stained with hematoxylin and eosin, was graded for percent necrotic tubular cells in the corticomedullary junction as follows: none, minimal ( $\leq 10\%$ ), moderate (10–30%), moderately severe (30–70%), and severe ( $>70\%$ ). A numerical value of 1 through 5, corresponding to the degree of injury where none = 1, minimal = 2, moderate = 3, moderately severe = 4, and severe = 5, was assigned to each group and used for statistical analysis of the data.

rates appeared to potentiate the severity of the corticomedullary necrosis (table 1, fig. 3D). Similarly, the administration of the 180- $\mu\text{mol/kg}$  mixture of the glutathione conjugates (40:60, alkane:alkene) of compound A in saline to rats produced minimal to moderately severe corticomedullary necrosis (table 1, fig. 3E), and pretreatment with acivicin before administration of the glutathione conjugates appeared to increase the severity of the renal damage in most of the rats (table 1, fig. 3F).

The histopathologic observations were substantiated by statistical analysis. The Jonckheere statistic with ties was computed for each of the three main experiments to test the hypothesis of an increasing trend for renal necrosis, whereas the Mann-Whitney U statistic was computed for each pair of treatments to identify differences in renal necrosis. First, the comparison of (1) control (NaHCO<sub>3</sub>), (2) mercapturate conjugates alone, and (3) AOAA plus mercapturate conjugates showed a highly significant trend for increasing renal necrosis for the treatments in the given order ( $P = 0.0044$ ). The pairwise comparisons found that the control produced significantly less renal necrosis than the other two treatments ( $P = 0.004$ ), but the one-sided Mann-Whitney U test could not reject the hypothesis that the addition of AOAA to mercapturate conjugates produced the same amount of renal necrosis as that of the mercapturate conjugates alone ( $P = 0.569$ ). Second, the comparison of (1) control (NaHCO<sub>3</sub>), (2) mercapturate conjugates alone, and (3) acivicin plus mercapturate conjugates also showed a highly significant trend for increasing renal necrosis ( $P < 0.0001$ ). The pairwise comparisons again found that the control produced significantly less renal necrosis than the other two treatments ( $P = 0.004$ ), and

that the addition of acivicin to mercapturate conjugates produced significantly more renal necrosis than the conjugates alone ( $P = 0.038$ ). Third, the comparison of (1) control (saline), (2) glutathione conjugates alone, and (3) acivicin plus glutathione conjugates also showed a highly significant trend for increasing renal necrosis ( $P = 0.0001$ ). The pairwise comparisons again found that the control produced significantly less renal necrosis than the other two treatments ( $P = 0.004$ ), and that the addition of acivicin to glutathione conjugates produced significantly more renal necrosis than the conjugates alone ( $P = 0.048$ ).

#### *Immunochemical Analysis of Protein Adducts of Compound A and Its Mercapturates*

Antisera were raised that could be used to detect tissue protein adducts of the thionoacyl halide metabolite of compound A (fig. 1). Analyses of the free lysine and bound fluorine atom content of the immunogen used to prepare the antisera revealed that 19 N-TFFMP-GABA haptens were bound to each RSA, which represents covalent modification of 30% of the 64 lysine residues of RSA. A high titer of anti-N-TFFMP-GABA immunoglobulin G was detected in the serum of one of two rabbits immunized with N-TFFMP-GABA-RSA, as determined by enzyme-linked immunosorbent assay (fig. 4A). The finding that N-TFFMP-GABA inhibited the enzyme-linked immunosorbent assay more than 80% and N-acetyl-GABA inhibited the assay by 20% (fig. 4B) indicated that the antisera contained antibodies specifically directed against the N-TFFMP moiety and not only those directed against the GABA moiety of the immunogen and therefore could be used to detect protein covalent adducts of the thionoacyl halide of compound A. The enzyme-

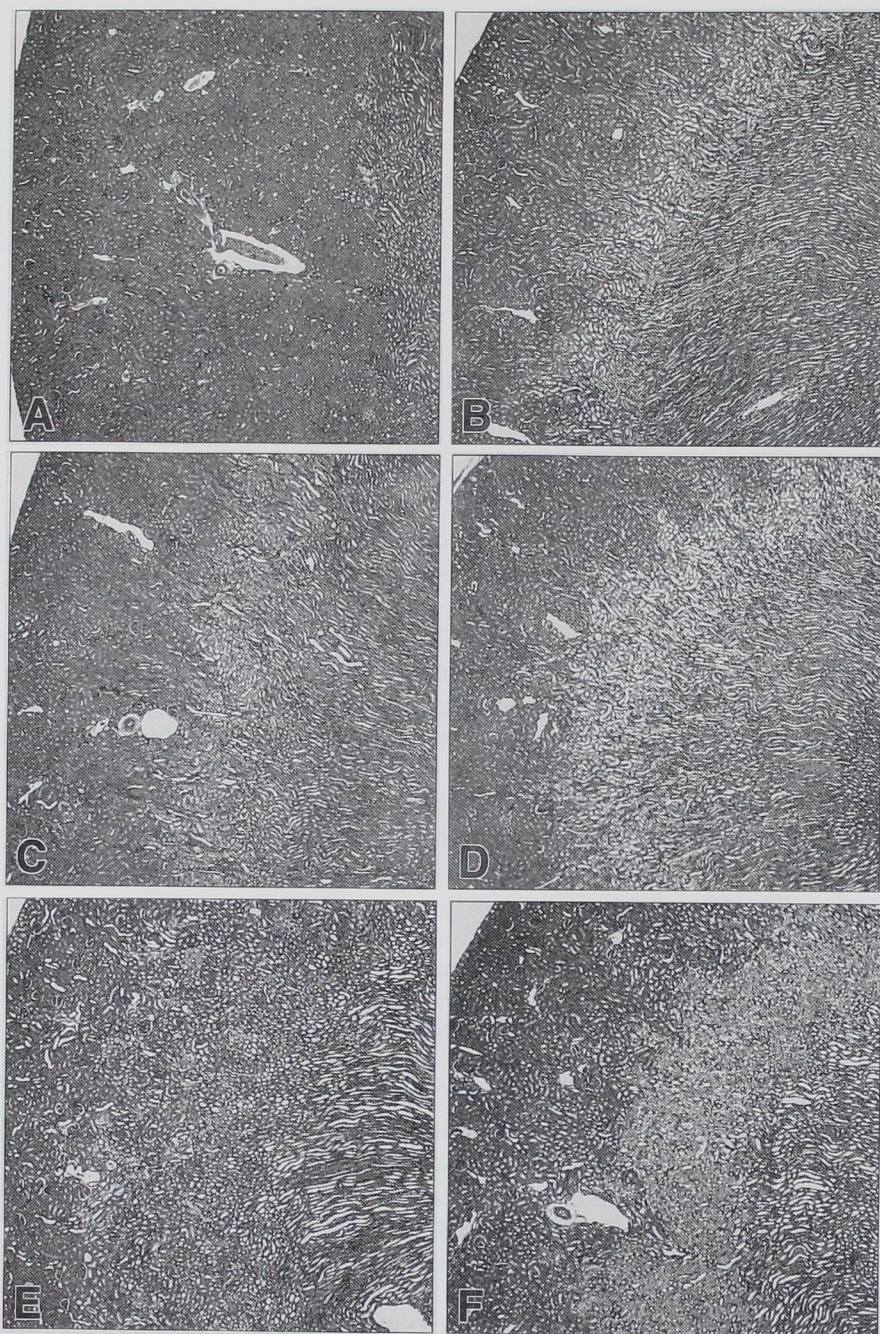

Fig. 3. Histologic evidence of corticomedullary necrosis after the administration of mercapturates or glutathione conjugates of compound A to Wistar rats. (A) Kidney section of a control rat. (B) Kidney section of a rat 24 h after intraperitoneal treatment with mercapturates of compound A (180  $\mu\text{mol/kg}$ ). (C) Same as B, except that the rat was pretreated with aminoxyacetic acid (500  $\mu\text{mol/kg}$  given intraperitoneally) 1 h before the administration of the mercapturates. (D) Same as B, except that the rat was pretreated with acivicin (250  $\mu\text{mol/kg}$  given intraperitoneally) 1 h before the administration of the mercapturates. (E) Kidney section of a rat 24 h after intraperitoneal treatment with glutathione conjugates of compound A (180  $\mu\text{mol/kg}$ ). (F) Same as E, except that the rat was pretreated with acivicin (250  $\mu\text{mol/kg}$  given intraperitoneally). The sections were stained with hematoxylin and eosin.

linked immunosorbent assay results were corroborated by immunoblot analysis (fig. 5, lane 2).

When rat kidney cytosol was incubated overnight with 1 mM of the mercapturates of compound A, a major protein adduct of approximately 55 kDa was detected in the cytosol by immunoblot analysis with N-TFFMP-GABA antisera (fig. 6A, lane 2). Immunochemical detection of this protein adduct was inhibited incrementally by pre-

incubation of the antisera with increasing concentrations of N-TFFMP-GABA before immunoblot analysis (fig. 6A, lanes 3 to 5), which indicated that the antibodies were reacting with the covalently bound thionoacyl halide metabolite of compound A. Furthermore, the antisera recognition of most of the adducts was reduced substantially by preincubation of the rat kidney cytosol with AOAA before incubation with the mercapturates

## MECHANISTIC STUDIES OF COMPOUND A NEPHROTOXICITY

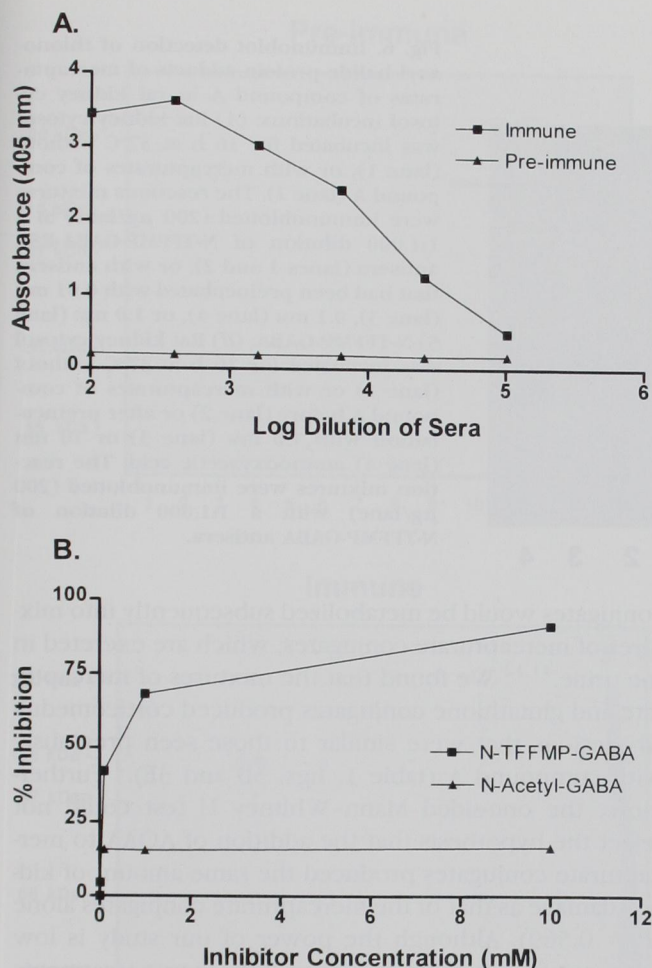

Fig. 4. Enzyme-linked immunosorbent assay determination for serum antibodies directed against the N-TFFMP moiety. A rabbit was immunized with N-TFFMP-GABA-RSA. The resulting immune sera and preimmune sera were tested for N-TFFMP antibodies in an enzyme-linked immunosorbent assay using TFFMP-GABA-ovalbumin as the test antigen (A). The reactivity of an immune serum sample (1:100,000 dilution) with TFFMP-GABA-ovalbumin was inhibited approximately 80% by N-TFFMP-GABA but only 20% by N-acetyl-GABA (B).

(fig. 6B, lanes 3 and 4). This finding indicated that the thionoacyl halide product of compound A immunohistochemically detected by our antisera was produced by a  $\beta$ -lyase enzyme, originating either from the cytosol or from bacteria present in the *in vitro* incubation solution, although there was no evidence of bacterial contamination.

No adducts of the thionoacyl halide metabolite of compound A were detected in immunoblots of kidney tissues of rats 5 and 24 h or 24 h after the administration of compound A (fig. 7) or the mercapturates, respectively (fig. 8). The only immunoreactivity seen in the blots after

compound A exposure was also seen with tissues of control animals or when the preimmune sera were used in place of the immune antisera (fig. 7). Furthermore, no adducts of the thionoacyl halide metabolite of compound A were detected immunohistochemically in the kidney sections of rats 5 and 24 h or 24 h after treatment with compound A or the mercapturates, respectively (results not shown).

## Discussion

The renal  $\beta$ -lyase pathway of metabolism has been established as an important bioactivation mechanism for several halogenated alkenes, such as tetrafluoroethylene, chlorotrifluoroethylene, hexafluoropropene, and 2-bromo-2-chloro-1,1-difluoroethylene,<sup>23,24</sup> which produce corticomedullary necrosis in the S3 segment of renal straight proximal tubules. This pathway of metabolic activation involves the initial formation of glutathione

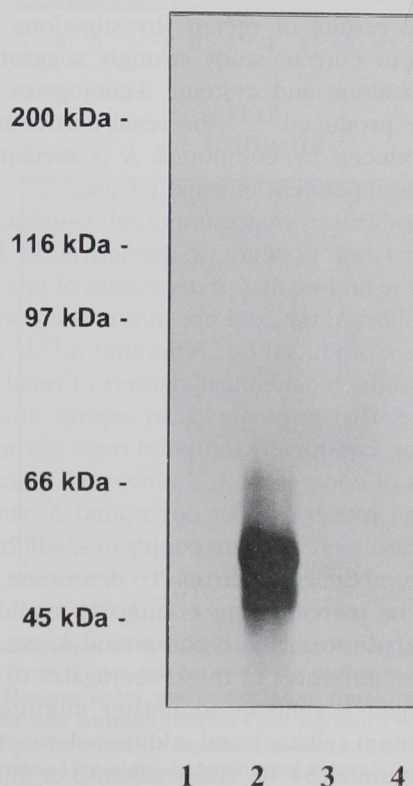

Fig. 5. Immunoblot determination of serum antibodies directed against the N-TFFMP moiety. Preimmune (lanes 3 and 4) and immune sera (lanes 1 and 2) (1:100,000 dilution) from a rabbit immunized with N-TFFMP-GABA-RSA were immunoblotted with ovalbumin (lanes 1 and 3, 1  $\mu$ g) or TFFMP-GABA-ovalbumin (lanes 2 and 4, 1  $\mu$ g).



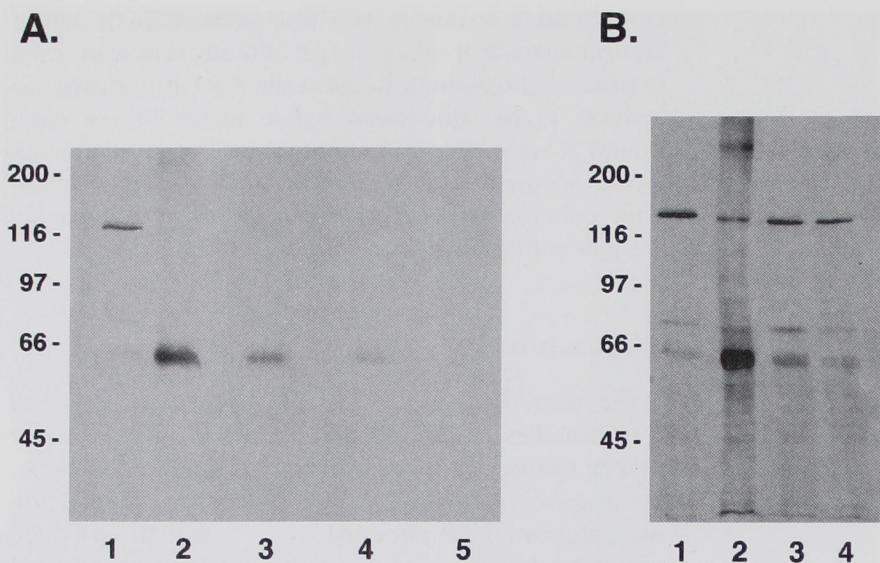

Fig. 6. Immunoblot detection of thionoacyl halide protein adducts of mercapturates of compound A in rat kidney cytosol incubations. (A) Rat kidney cytosol was incubated for 16 h at 37°C without (lane 1), or with mercapturates of compound A (lane 2). The reactions mixtures were immunoblotted (200  $\mu$ g/lane) at a 1:1,000 dilution of N-TFFMP-GABA-RSA antisera (lanes 1 and 2), or with antisera that had been preincubated with 0.01 mM (lane 3), 0.1 mM (lane 4), or 1.0 mM (lane 5) N-TFFMP-GABA. (B) Rat kidney cytosol was incubated for 16 h at 37°C without (lane 1) or with mercapturates of compound A before (lane 2) or after preincubation with 1.0 mM (lane 3) or 10 mM (lane 4) aminooxyacetic acid. The reaction mixtures were immunoblotted (200  $\mu$ g/lane) with a 1:1,000 dilution of N-TFFMP-GABA antisera.

conjugates, further metabolism to cysteine S-conjugates, and the renal  $\beta$ -lyase-dependent formation of toxic thionoacyl halide metabolites from the cysteine S-conjugates (fig. 1). The results of recent investigations and the findings of our current study strongly suggest that although glutathione and cysteine S-conjugates of compound A are produced,<sup>11,12</sup> the renal corticomedullary necrosis produced by compound A is mediated by a mechanism independent of renal  $\beta$ -lyase.

The first indication that compound A-induced renal necrosis does not depend on bioactivation by renal  $\beta$ -lyase was the finding that pretreatment of rats with the  $\beta$ -lyase inhibitor, AOAA, did not inhibit the corticomedullary necrosis produced by compound A,<sup>14,15</sup> although it improved some biochemical markers of renal injury.<sup>15</sup> The discovery that probenecid, an organic anion transport inhibitor, completely inhibited renal corticomedullary necrosis of compound A,<sup>15</sup> however, indicated that organic anion metabolites of compound A, such as its glutathione and mercapturate conjugates, still had a role in the corticomedullary necrosis. To determine whether glutathione or mercapturate conjugates could have a role in the nephrotoxicity of compound A, we administered isomeric mixtures of these conjugates to rats (fig. 1). We thought it valid to administer mixtures of the purified addition (alkane) and addition-elimination (alkene) mercapturate (54:46, alkane:alkene) or glutathione (40:60, alkane:alkene) conjugates instead of individual conjugates for our studies, because it had been reported that alkane and the alkene glutathione conjugates are excreted in the bile of rats treated with compound A at an approximate ratio of 1:1.<sup>16</sup> Furthermore, glutathione

conjugates would be metabolized subsequently into mixtures of mercapturate conjugates, which are excreted in the urine.<sup>11,12</sup> We found that the mixtures of mercapturate and glutathione conjugates produced corticomedullary lesions that were similar to those seen previously with compound A (table 1, figs. 3B and 3E).<sup>2</sup> Furthermore, the one-sided Mann-Whitney U test could not reject the hypothesis that the addition of AOAA to mercapturate conjugates produced the same amount of kidney damage as that of the mercapturate conjugates alone ( $P = 0.569$ ). Although the power of our study is low because of our sample size, even if these two treatments were distributed normally with standard deviations of 1 unit, sample sizes of 100 and 250 per treatment group would be needed to detect differences between the treatment means of 0.4 and 0.25, respectively, with 80% power. Clearly, such large sample sizes are not feasible. Nevertheless, our findings are consistent with those of previous studies of the effects of AOAA on the kidney histopathology of compound A.<sup>14,15</sup>

The use of the mixtures of the alkane and alkene conjugates of compound A to investigate the potential roles of these conjugates in compound A renal necrosis was validated recently. A report showed renal corticomedullary necrosis after the administration of either purified alkane or alkene glutathione conjugates to male Fischer 344 rats.<sup>25</sup> In the same study, the nephrotoxicity of the individual alkane and alkene cysteine S-conjugates was also studied, and the investigators found that only the alkane produced kidney damage.

Other findings indicate that renal  $\beta$ -lyase may have a minor, if any, role in the renal necrosis produced by

## MECHANISTIC STUDIES OF COMPOUND A NEPHROTOXICITY

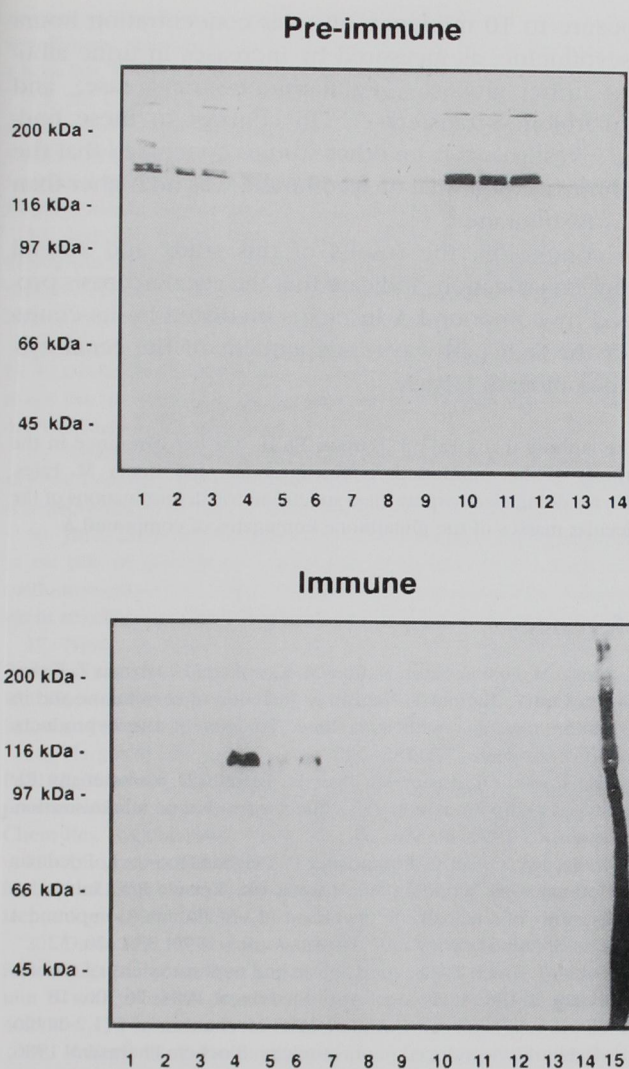

Fig. 7. Immunoblots of homogenates and subcellular fractions of kidneys from Wistar rats treated with compound A. Homogenates and subcellular fractions of kidneys were pooled and immunoblotted (200  $\mu\text{g}/\text{lane}$ ) with a 1:1,000 dilution of preimmune or immune antisera. Lanes 1, 4, 7, 10, and 13 contained fractions from control animals, whereas lanes 2, 5, 8, and 11 and 3, 6, 9, 12, and 14 contained fractions that were isolated 5 and 24 h, respectively, after treatment of rats for 3 h with 300 ppm compound A. The tissue fractions in each of the lanes were total homogenate (1–3), nuclear (4–6), mitochondrial (7–9), cytosolic (10–12), and microsomes (13–14). Lane 15 contained 1  $\mu\text{g}$  N-FFMP-GABA-ovalbumin as a positive control.

compound A. For example, covalent adducts of the thionoacyl halide metabolite of compound A, formed from the renal cysteine conjugate  $\beta$ -lyase metabolism of cysteine S-conjugates of compound A (fig. 1), could not be detected in renal tissues of rats administered compound A or its mercapturates, using immunoblotting (figs. 7 and 8) or immunohistochemical techniques. Although we

cannot preclude the possibility that the covalent adducts once formed *in vivo* are rapidly degraded or that the thionoacyl moiety is cleaved readily from renal proteins, or both, the results of two recent reports support our immunochemical findings. First it was discovered that the cysteine conjugates of compound A are poor sub-

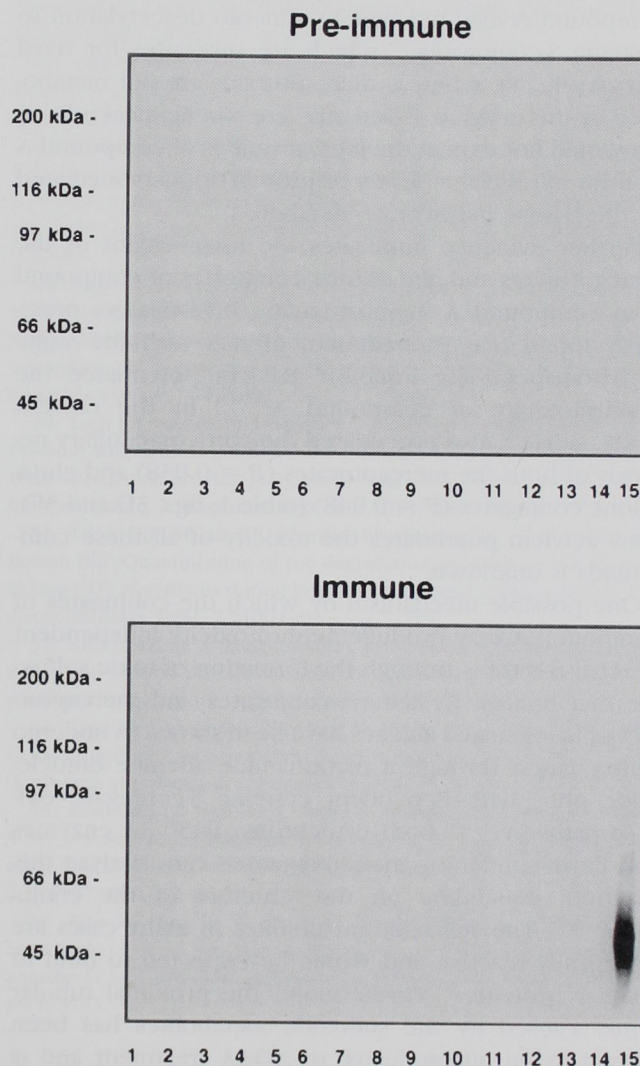

Fig. 8. Immunoblots of homogenates and subcellular fractions of kidneys from Wistar rats treated with mercapturates of compound A. Homogenates and subcellular fractions of kidneys were pooled and immunoblotted (200  $\mu\text{g}/\text{lane}$ ) with a 1:1,000 dilution of preimmune or immune antisera. Lanes 1, 4, 7, 10, and 13 contained fractions from control animals, whereas lanes 2, 5, 8, and 11 and 3, 6, 9, 12, and 14 contained fractions that were isolated 24 h after treatment of rats with 90 or 180  $\mu\text{mol}/\text{kg}$  mercapturates of compound A, respectively. The tissue fractions in each of the lanes were total homogenate (1–3), nuclear (4–6), mitochondrial (7–9), cytosolic (10–12), and microsomes (13–14). Lane 15 contained 1  $\mu\text{g}$  N-FFMP-GABA-ovalbumin as a positive control.

strates for renal cysteine conjugate  $\beta$ -lyase.<sup>13</sup> That study showed that the cysteine conjugate of chlorotrifluoroethene, which causes nephrotoxicity by a renal  $\beta$ -lyase-mediated pathway,<sup>7</sup> is metabolized *in vitro* by cytosolic rat renal  $\beta$ -lyase approximately 10 times more rapidly than the cysteine conjugates of compound A. Second, it was reported that mercapturate conjugates of compound A may not readily undergo deacetylation to cysteine S-conjugates,<sup>26</sup> which are substrates for renal  $\beta$ -lyase (fig. 1), whereas mercapturates are not metabolized by this enzyme. Based on these biochemical results, we would not expect the mercapturates of compound A to form appreciable levels of protein adducts mediated by the  $\beta$ -lyase pathway of metabolism.

Further evidence implicates the involvement of the mercapturates and glutathione conjugates of compound A in compound A nephrotoxicity. Investigators previously found that pretreatment of rats with the  $\gamma$ -glutamyltranspeptidase inhibitor acivicin potentiated the nephrotoxicity of compound A.<sup>14,15</sup> In the current study, acivicin also potentiated the corticomedullary necrosis of both the mercapturates ( $P = 0.038$ ) and glutathione conjugates ( $P = 0.048$ ) (table 1, figs. 3D and 3F). How acivicin potentiates the toxicity of all these compounds is unknown.

One possible mechanism by which the conjugates of compound A may produce nephrotoxicity independent of renal  $\beta$ -lyase is through the formation of toxic sulfoxide metabolites. Cysteine S-conjugates and mercapturates of halogenated alkenes have been shown to undergo sulfoxidation through a nicotinamide adenine dinucleotide phosphate-dependent cysteine S-conjugate-oxidase pathway.<sup>27,28</sup> Both cytochrome P450 3A enzymes and flavin-containing monooxygenase can catalyze this reaction, depending on the structure of the conjugates.<sup>28,29</sup> The sulfoxide metabolites in many cases are chemically reactive and would be expected to bind to cellular proteins.<sup>30</sup> Furthermore, the proximal tubular injury caused by the sulfoxide metabolites has been shown to be unresponsive to AOAA treatment and is more severe than that caused by the corresponding cysteine S-conjugates.<sup>28,30</sup>

The potential for compound A nephrotoxicity in humans anesthetized with sevoflurane has been discussed repeatedly, because concentrations of this compound as high as 61 ppm have been seen in clinical practice,<sup>31</sup> which is near the threshold known to cause renal injury in rats (25 to 50 ppm).<sup>32</sup> In one study, a substantial number of healthy male volunteers showed signs of transient subclinical renal injury, peaking 3 days after

exposure to 10 minimum alveolar concentration hours of sevoflurane, as measured by increases in urine albumin, urine glucose,  $\alpha$ -glutathione-S-transferase, and  $\pi$ -glutathione-S-transferase.<sup>33</sup> In contrast to these findings, investigators from other studies concluded that the nephrotoxic potential of sevoflurane was no higher than that of isoflurane.<sup>34,35</sup>

In conclusion, the results of this study and several recent investigations indicate that the renal necrosis produced by compound A in rats is mediated by its conjugates through pathways independent of the renal cysteine conjugate  $\beta$ -lyase.

The authors thank Sally J. Hargus, Ph.D., for her assistance in the synthesis of the compound A mercapturates, and Henry M. Fales, Ph.D., for doing electrospray mass spectrometric determinations of the molecular masses of the glutathione conjugates of compound A.

## References

- Morio M, Fujii K, Satoh N, Imai M, Kawakami U, Mizuno T, Kawai Y, Ogasawara Y, Tamura T, Negishi A: Reaction of sevoflurane and its degradation products with soda lime. Toxicity of the byproducts. *ANESTHESIOLOGY* 1992; 77:1155-64
- Gonsowski CT, Laster MJ, Eger EI, Ferrell LD, Kerschmann RL: Toxicity of compound A in rats. Effect of a 3-hour administration. *ANESTHESIOLOGY* 1994; 80:556-65
- Keller KA, Callan C, Prokocimer P, Delgado-Herrera L, Friedman MB, Hoffman GM, Wooding WL, Cusick PK, Krasula RW: Inhalation toxicity study of a haloalkene degradant of sevoflurane, Compound A (PIFE), in Sprague-Dawley rats. *ANESTHESIOLOGY* 1995; 83:1220-32
- Odum J, Green T: The metabolism and nephrotoxicity of tetrafluoroethylene in the rat. *Toxicol Appl Pharmacol* 1984; 76:306-18
- Elfarra AA, Jakobson I, Anders MW: Mechanism of S-(1,2-dichlorovinyl)glutathione-induced nephrotoxicity. *Biochem Pharmacol* 1986; 35:283-8
- Finkelstein MB, Baggs RB, Anders MW: Nephrotoxicity of the glutathione and cysteine conjugates of 2-bromo-2-chloro-1,1-difluoroethene. *J Pharmacol Exp Ther* 1992; 261:1248-52
- Dohn DR, Leininger JR, Lash LH, Quebbemann AJ, Anders MW: Nephrotoxicity of S-(2-chloro-1,1,2-trifluoroethyl)glutathione and S-(2-chloro-1,1,2-trifluoroethyl)-L-cysteine, the glutathione and cysteine conjugates of chlorotrifluoroethene. *J Pharmacol Exp Ther* 1985; 235: 851-7
- Hayden PJ, Ichimura T, McCann DJ, Pohl LR, Stevens JL: Detection of cysteine conjugate metabolite adduct formation with specific mitochondrial proteins using antibodies raised against halothane metabolite adducts. *J Biol Chem* 1991; 266:18415-8
- Hargus SJ, Anders MW: Immunochemical detection of covalently modified kidney proteins in S-(1,1,2,2-tetrafluoroethyl)-L-cysteine-treated rats. *Biochem Pharmacol* 1991; 42:R17-R20
- Bruschi SA, West KA, Crabb JW, Gupta RS, Stevens JL: Mitochondrial HSP60 (P1 protein) and a HSP70-like protein (mortalin) are major targets for modification during S-(1,1,2,2-tetrafluoroethyl)-L-cysteine-induced nephrotoxicity. *J Biol Chem* 1993; 268:23157-61
- Spracklin DK, Kharasch ED: Evidence for metabolism of flu-

## MECHANISTIC STUDIES OF COMPOUND A NEPHROTOXICITY

oromethyl 2,2-difluoro-1-(trifluoromethyl)vinyl ether (compound A), a sevoflurane degradation product, by cysteine conjugate beta-lyase. *Chem Res Toxicol* 1996; 9:696-702

12. Jin L, Baillie TA, Davis MR, Kharasch ED: Nephrotoxicity of sevoflurane compound A [fluoromethyl-2,2-difluoro-1-(trifluoromethyl)vinyl ether] in rats: Evidence for glutathione and cysteine conjugate formation and the role of renal cysteine conjugate beta-lyase. *Biochem Biophys Res Commun* 1995; 210:498-506

13. Iyer RA, Anders MW: Cysteine conjugate beta-lyase-dependent biotransformation of the cysteine S-conjugates of the sevoflurane degradation product compound A in human, nonhuman primate, and rat kidney cytosol and mitochondria. *ANESTHESIOLOGY* 1996; 85:1454-61

14. Martin JL, Laster MJ, Kandel L, Kerschmann RL, Reed GF, Eger EI: Metabolism of compound A by renal cysteine-S-conjugate beta-lyase is not the mechanism of compound A-induced renal injury in the rat. *Anesth Analg* 1996; 82:770-4

15. Kharasch ED, Thorning D, Garton K, Hankins DC, Kilty CG: Role of renal cysteine conjugate beta-lyase in the mechanism of compound A nephrotoxicity in rats. *ANESTHESIOLOGY* 1997; 86:160-71

16. Jin L, Davis MR, Kharasch ED, Doss GA, Baillie TA: Identification in rat bile of glutathione conjugates of fluoromethyl 2,2-difluoro-1-(trifluoromethyl)vinyl ether, a nephrotoxic degradate of the anesthetic agent sevoflurane. *Chem Res Toxicol* 1996; 9:555-61

17. Njoku D, Laster MJ, Gong DH, Eger EI, Reed GF, Martin JL: Biotransformation of halothane, enflurane, isoflurane, and desflurane to trifluoroacetylated liver proteins: Association between protein acylation and hepatic injury. *Anesth Analg* 1997; 84:173-8

18. Hargus SJ, Amouzedeh HR, Pumford NR, Myers TG, McCoy SC, Pohl LR: Metabolic activation and immunochemical localization of liver protein adducts of the nonsteroidal anti-inflammatory drug diclofenac. *Chem Res Toxicol* 1994; 7:575-82

19. Amouzadeh HR, Pohl LR: Processing of endoplasmic reticulum luminal antigens associated with halothane hepatitis in rat hepatocytes. *Hepatology* 1995; 22:936-43

20. Davis MT, Preston JF: A simple modified carbodiimide method for conjugation of small-molecular-weight compounds to immunoglobulin G with minimal protein crosslinking. *Anal Biochem* 1981; 116:402-7

21. Habeeb AF: Determination of free amino groups in proteins by trinitrobenzenesulfonic acid. *Anal Biochem* 1966; 14:328-36

22. Hollander M, Wolfe DA: The one-way layout, Nonparametric Statistical Methods. New York, John Wiley & Sons, 1973, pp 120-3

23. Commandeur JN, Stijntjes GJ, Vermeulen NP: Enzymes and transport systems involved in the formation and disposition of glutathione S-conjugates. Role in bioactivation and detoxication mechanisms of xenobiotics. *Pharmacol Rev* 1995; 47:271-330

24. Commandeur JN, Vermeulen NP: Molecular and biochemical mechanisms of chemically induced nephrotoxicity: A review. *Chem Res Toxicol* 1990; 3:171-94

25. Iyer RA, Baggs RB, Anders MW: Nephrotoxicity of the glutathione and cysteine S-conjugates of the sevoflurane degradation product 2-(Fluoromethoxy)-1,1,3,3,3-pentafluoro-1-propene (Compound A) in male fischer 344 rats. *J Pharmacol Exp Ther* 1997; 283:1544-51

26. Utamsingh V, Iyer RA, Anders MW: Fate and toxicity of 2-(fluoromethoxy)-1,1,3,3,3-pentafluoro-1-propene (compound A)-derived mercapturates (abstract). *Toxicologist* 1998; 42:431

27. Sausen PJ, Elfarra AA: Cysteine conjugate S-oxidase. Characterization of a novel enzymatic activity in rat hepatic and renal microsomes. *J Biol Chem* 1990; 265:6139-45

28. Werner M, Birner G, Dekant W: Sulfoxidation of mercapturic acids derived from tri- and tetrachloroethene by cytochromes P450 3A: A bioactivation reaction in addition to deacetylation and cysteine conjugate beta-lyase mediated cleavage. *Chem Res Toxicol* 1996; 9:41-9

29. Ripp SL, Overby LH, Philpot RM, Elfarra AA: Oxidation of cysteine S-conjugates by rabbit liver microsomes and cDNA-expressed flavin-containing mono-oxygenases: Studies with S-(1,2-dichlorovinyl)-L-cysteine, S-(1,2,2-trichlorovinyl)-L-cysteine, S-allyl-L-cysteine, and S-benzyl-L-cysteine. *Mol Pharmacol* 1997; 51:507-15

30. Lash LH, Sausen PJ, Duescher RJ, Cooley AJ, Elfarra AA: Roles of cysteine conjugate beta-lyase and S-oxidase in nephrotoxicity: Studies with S-(1,2-dichlorovinyl)-L-cysteine and S-(1,2-dichlorovinyl)-L-cysteine sulfoxide. *J Pharmacol Exp Ther* 1994; 269:374-83

31. Frink EJJ, Malan TP, Morgan SE, Brown EA, Malcomson M, Brown BRJ: Quantification of the degradation products of sevoflurane in two CO2 absorbants during low-flow anesthesia in surgical patients. *ANESTHESIOLOGY* 1992; 77:1064-9

32. Bito H, Ikeda K: Long-duration, low-flow sevoflurane anesthesia using two carbon dioxide absorbents. Quantification of degradation products in the circuit. *ANESTHESIOLOGY* 1994; 81:340-5

33. Eger EI, Koblin DD, Bowland T, Ionescu P, Laster MJ, Fang Z, Gong D, Sonner J, Weiskopf RB: Nephrotoxicity of sevoflurane versus desflurane anesthesia in volunteers. *Anesth Analg* 1997; 84:160-8

34. Kharasch ED, Frink EJJ, Zager R, Bowdle TA, Artru A, Nogami WM: Assessment of low-flow sevoflurane and isoflurane effects on renal function using sensitive markers of tubular toxicity. *ANESTHESIOLOGY* 1997; 86:1238-53

35. Bito H, Ikeuchi Y, Ikeda K: Effects of low-flow sevoflurane anesthesia on renal function: Comparison with high-flow sevoflurane anesthesia and low-flow isoflurane anesthesia. *ANESTHESIOLOGY* 1997; 86:1231-7
